# Supplementary material for: Development of Single-Channel Hybrid BCI System Using Motor Imagery and SSVEP
Source: Hindawi journal article supplement (doi:10.1155/2017/3789386), 2017-01-01
Supplement: f1 [file 3789386.f1.pdf]

## Development of Single Channel Hybrid BCI System using Motor Imagery and SSVEP

### Subject wise accuracy tables

1) Classification accuracy for three tasks (hybrid, MI and SSVEP) at C3 channel using LDC (for duration of 4sec).

| subject | Hyb   | MI    | SSVEP |
|---------|-------|-------|-------|
| 1       | 95.86 | 54.14 | 76.50 |
| 2       | 72.88 | 53.41 | 61.50 |
| 3       | 74.78 | 52.00 | 68.50 |
| 4       | 90.82 | 55.75 | 52.50 |
| 5       | 83.89 | 54.67 | 64.00 |
| 6       | 92.75 | 60.82 | 60.00 |
| 7       | 89.41 | 60.56 | 58.50 |
| 8       | 72.94 | 49.56 | 67.00 |
| 9       | 89.14 | 61.18 | 71.00 |
| 10      | 94.38 | 54.71 | 76.50 |
| 11      | 92.82 | 53.22 | 69.50 |
| 12      | 89.38 | 53.43 | 64.50 |
| 13      | 90.88 | 51.78 | 77.50 |
| 14      | 77.25 | 55.88 | 70.50 |
| 15      | 78.86 | 52.50 | 80.50 |
| 16      | 83.88 | 58.88 | 89.00 |
| Avg     | 85.62 | 55.15 | 69.22 |

2) Classification accuracy for three tasks (hybrid, MI and SSVEP) at C4 channel using LDC (for duration of 4sec).

| subject | Hyb   | MI    | SSVEP |
|---------|-------|-------|-------|
| 1       | 96.00 | 57.57 | 87.00 |
| 2       | 75.25 | 59.88 | 59.50 |
| 3       | 78.33 | 57.22 | 84.50 |
| 4       | 77.65 | 52.63 | 57.50 |
| 5       | 92.67 | 49.33 | 68.50 |
| 6       | 88.25 | 53.29 | 66.50 |
| 7       | 83.18 | 59.78 | 54.50 |
| 8       | 76.12 | 50.00 | 82.00 |
| 9       | 90.29 | 59.06 | 66.50 |

|     |       |       |       |
|-----|-------|-------|-------|
| 10  | 93.63 | 60.86 | 71.00 |
| 11  | 97.65 | 53.67 | 65.50 |
| 12  | 84.50 | 65.43 | 67.00 |
| 13  | 93.25 | 48.78 | 80.50 |
| 14  | 73.50 | 57.75 | 59.50 |
| 15  | 79.00 | 53.75 | 61.00 |
| 16  | 80.38 | 54.88 | 80.50 |
| Avg | 84.98 | 55.87 | 69.47 |

3) Classification accuracy of Hybrid task at C3 channel using LDC (for duration of 4, 3 and 2 seconds).

| subject | 4s    | 3s    | 2s    |
|---------|-------|-------|-------|
| 1       | 95.86 | 90.14 | 87.57 |
| 2       | 72.88 | 72.25 | 64.25 |
| 3       | 74.78 | 66.67 | 65.67 |
| 4       | 90.82 | 80.35 | 69.18 |
| 5       | 83.89 | 84.56 | 66.44 |
| 6       | 92.75 | 91.00 | 81.13 |
| 7       | 89.41 | 86.12 | 72.71 |
| 8       | 72.94 | 67.76 | 63.76 |
| 9       | 89.14 | 84.14 | 78.43 |
| 10      | 94.38 | 90.50 | 80.00 |
| 11      | 92.82 | 90.82 | 83.18 |
| 12      | 89.38 | 81.50 | 77.00 |
| 13      | 90.88 | 86.13 | 78.63 |
| 14      | 77.25 | 72.88 | 66.75 |
| 15      | 78.86 | 73.86 | 68.86 |
| 16      | 83.88 | 85.63 | 82.63 |
| Avg     | 85.62 | 81.52 | 74.14 |

7) Classification accuracy of Hybrid task at C4 channel using LDC (for duration of 4, 3 and 2 seconds).

| subject | 4s    | 3s    | 2s    |
|---------|-------|-------|-------|
| 1       | 96.00 | 95.29 | 89.14 |
| 2       | 75.25 | 74.38 | 68.50 |
| 3       | 78.33 | 73.56 | 68.56 |
| 4       | 77.65 | 77.06 | 68.24 |
| 5       | 92.67 | 90.11 | 83.67 |
| 6       | 88.25 | 81.00 | 79.00 |

|     |       |       |       |
|-----|-------|-------|-------|
| 7   | 83.18 | 80.82 | 64.71 |
| 8   | 76.12 | 72.24 | 67.41 |
| 9   | 90.29 | 86.57 | 72.43 |
| 10  | 93.63 | 85.75 | 78.88 |
| 11  | 97.65 | 95.53 | 83.06 |
| 12  | 84.50 | 74.63 | 70.88 |
| 13  | 93.25 | 84.50 | 81.88 |
| 14  | 73.50 | 68.25 | 63.88 |
| 15  | 79.00 | 75.71 | 72.57 |
| 16  | 80.38 | 82.00 | 77.00 |
| Avg | 84.98 | 81.09 | 74.36 |
